# Supplementary material
Source: publisher site journal article supplement (https://rethinkingecology.pensoft.net/article/36467/download/suppl/31/)
Supplement: Supplementary file 1

**Supplementary Information**

**Table S1:**

*Influence of light pollution on the grooming and foraging durations in High-quality food condition.*

GLMM models selection table based on the Akaike Information Criterion (AICc). Presence (+) or absence (-) for qualitative effects, AICc computations and relative variable importance (Weight) are indicated for each model. Best models are shown in bold. Best models’ parameter estimates are presented below the selection table.

| ***Grooming duration*** | | | | | |
| --- | --- | --- | --- | --- | --- |
| Models | Light intensity | Sex | AICc | ΔAICc | Weight |
| **Model 1** | **+** |  | **1053.2** | **0.000** | **0.780** |
| Model 2 | + | + | 1055.7 | 2.54 | 0.219 |
| Model 3 |  |  | 1069.5 | 16.4 | 0.000 |
| Model 4 |  | + | 1071.9 | 18.7 | 0.000 |
| Parameter estimates |  | χ² | Df | *P*-value |  |
| Intercept |  | 0.912 | 1, 33 | 0.340 |  |
| **Light intensity** |  | **18.6** | **1, 33** | **< 0.001** |  |
| Sex |  | 0.002 | 1, 33 | 0.963 |  |

| ***Foraging duration*** | | | | | |
| --- | --- | --- | --- | --- | --- |
| Models | Light intensity | Sex | AICc | ΔAICc | Weight |
| **Model 1** | **+** |  | **1041.6** | **0.000** | **0.781** |
| Model 2 | + | + | 1044.1 | 2.54 | 0.219 |
| Model 3 |  |  | 1065.3 | 23.7 | 0.000 |
| Model 4 |  | + | 1067.6 | 26.0 | 0.000 |
| Parameter estimates |  | χ² | Df | *P*-value |  |
| Intercept |  | 3.38 | 1, 33 | 0.066 |  |
| **Light intensity** |  | **25.6** | **1, 33** | **< 0.001** |  |
| Sex |  | 0.001 | 1, 33 | 0.980 |  |

**Table S2:**

*Influence of light pollution on the grooming and foraging durations in low-quality food (LQF) condition.*

GLMM models selection table based on the Akaike Information Criterion (AICc) to determine the best models. Presence (+) or absence (-) for qualitative effects, AICc computations and relative variable importance (Weight) are indicated for each model. Best models are shown in bold. Best models’ parameter estimates are presented below the selection table.

| ***Grooming duration*** | | | | | |
| --- | --- | --- | --- | --- | --- |
| Models | Light intensity | Sex | AICc | ΔAICc | Weight |
| **Model 1** | **+** |  | **1659.8** | **0.000** | **0.550** |
| Model 2 | + | + | 1660.2 | 0.400 | 0.450 |
| Model 3 |  |  | 1712.6 | 52.9 | 0.000 |
| Model 4 |  | + | 1712.8 | 53.0 | 0.000 |
| Parameter estimates |  | χ² | Df | *P*-value |  |
| Intercept |  | 0.248 | 1, 33 | 0.618 |  |
| **Light intensity** |  | **55.2** | **1, 33** | **< 0.001** |  |
| Sex |  | 2.27 | 1, 33 | 0.132 |  |

| ***Foraging duration*** | | | | | |
| --- | --- | --- | --- | --- | --- |
| Models | Light intensity | Sex | AICc | ΔAICc | Weight |
| Model 1 | + |  | 601.6 | 0.000 | 0.367 |
| Model 2 | + | + | 602.5 | 0.840 | 0.240 |
| **Model 3** |  |  | **602.5** | **0.880** | **0.236** |
| Model 4 |  | + | 603.3 | 1.70 | 0.157 |
| Parameter estimates |  | χ² | Df | *P*-value |  |
| Intercept |  | 1.69 | 1, 33 | 0.194 |  |
| Light intensity |  | 3.40 | 1, 33 | 0.065 |  |
| Sex |  | 1.78 | 1, 33 | 0.182 |  |
